# Supplementary material
Source: MDPI journal article supplement (https://www.mdpi.com/2077-1312/9/10/1114)
Supplement: s1 [file s1 › jmse-1409923-supplementary.pdf]

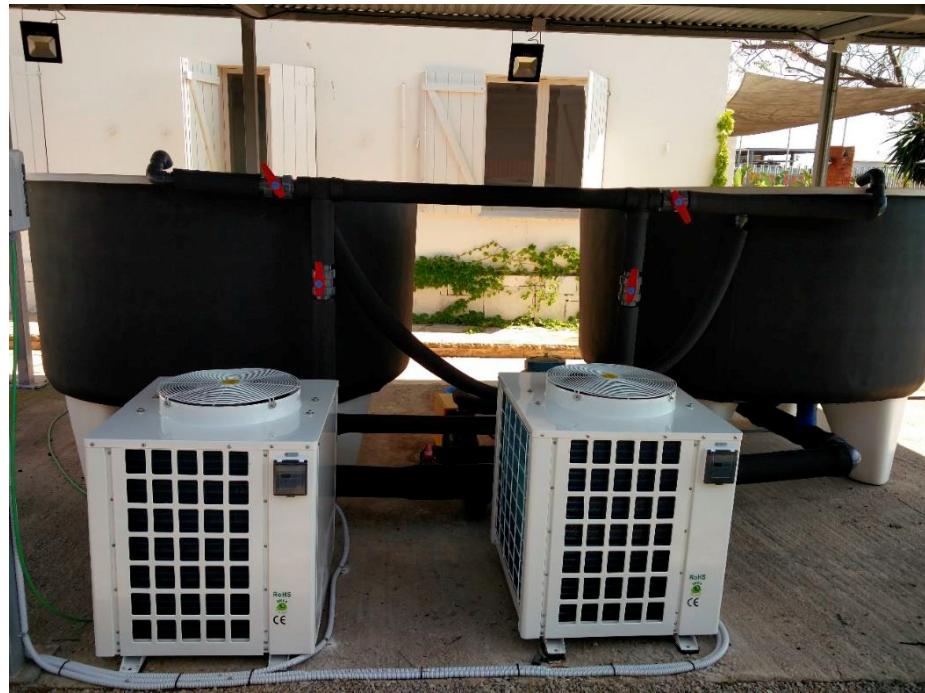

**Figure S1.** Salmon tanks and refrigeration system.

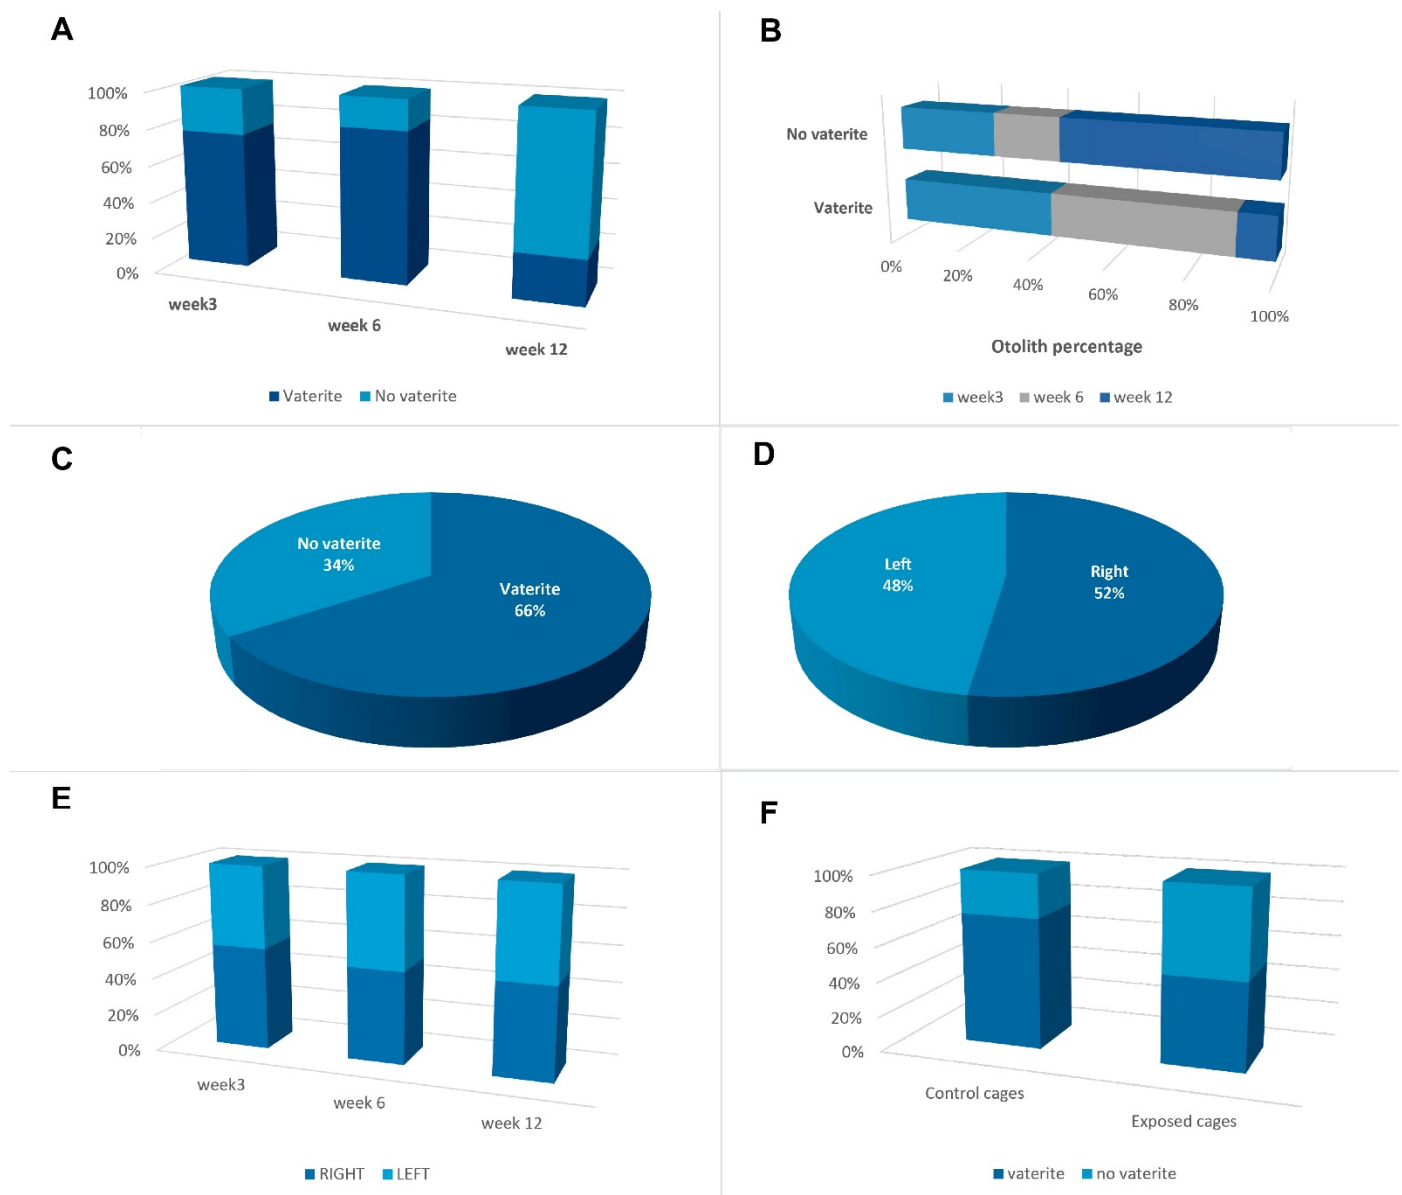

**Figure S2.** Incidence of vaterite on the salmon otoliths. (A,B): Incidence of vaterite versus time. (C): Incidence of vaterite on total sampled fishes. (D): Incidence of vaterite in right and left otolith on total sampled fishes. (E): Incidence of vaterite on right and left otolith versus time. (F): Incidence of vaterite on total sampled fishes versus control/exposed cages.

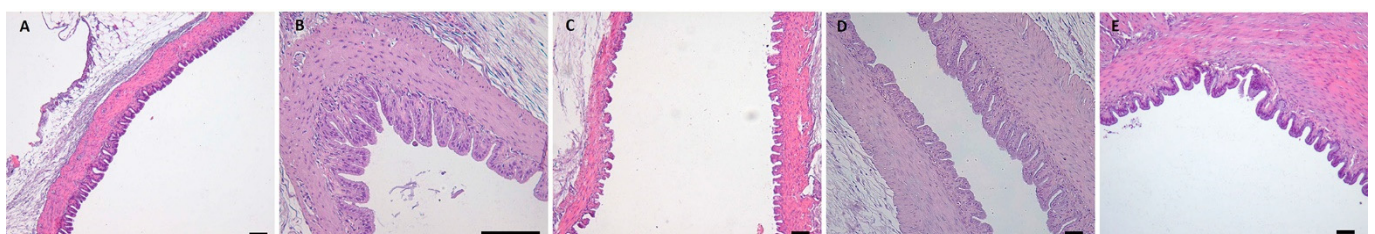

**Figure S3.** Swimbladder with normal aspect of salmons from sea trial experiment. (A): Control. (B): 3 weeks after exposure. (C): 6 weeks after exposure. (D): 9 weeks after exposure. (E): 12 weeks after exposure. Scale bar: 100µm.
